# Supplementary material for: Design and synthesis of new functionalized 8-(thiophen-2-yl)-1,2,3,4-tetrahydroquinolines as turn-off chemosensors for selective recognition of Pd2+ions
Source: Royal Society of Chemistry journal article supplement (doi:10.1039/d0nj02272a), 2020-01-01
Supplement: d0nj02272a1.pdf [file d0nj02272a1.pdf]

## Electronic Supplementary Information

### Design and synthesis of new functionalized 8-(thiophen-2-yl)-1,2,3,4-tetrahydroquinolines as *turn-off* chemosensors for selective recognition of Pd<sup>2+</sup> ion

Shally,<sup>a</sup> Vijay Kumar,<sup>a</sup> Ismail Althagafi,<sup>b</sup> Ashish Kumar,<sup>a</sup> Divya Singhal,<sup>a</sup> Abhinav Kumar,<sup>c</sup> Rajiv Gupta<sup>a</sup> and Ramendra Pratap<sup>a</sup>

<sup>a</sup>Department of Chemistry, University of Delhi, North Campus, Delhi, India, Pin-110007

<sup>b</sup>Department of Chemistry, Umm Al-Qura University, Makkah, Saudi Arabia

<sup>c</sup>Department of Chemistry, University of Lucknow, Lucknow, Uttar Pradesh, India-226009

| List of Fig.    |                                                                                                    | Page No.  |
|-----------------|----------------------------------------------------------------------------------------------------|-----------|
| <b>Fig. S1</b>  | <sup>1</sup> H NMR and <sup>13</sup> C NMR spectra of L1.                                          | <b>2</b>  |
| <b>Fig. S2</b>  | <sup>1</sup> H NMR and <sup>13</sup> C NMR spectra of L2.                                          | <b>3</b>  |
| <b>Fig. S3</b>  | <sup>1</sup> H NMR and <sup>13</sup> C NMR spectra of L3.                                          | <b>4</b>  |
| <b>Fig. S4</b>  | HRMS spectrum of L1.                                                                               | <b>5</b>  |
| <b>Fig. S5</b>  | HRMS spectrum of L2.                                                                               | <b>6</b>  |
| <b>Fig. S6</b>  | FTIR spectrum of L1.                                                                               | <b>7</b>  |
| <b>Fig. S7</b>  | FTIR spectrum of L2.                                                                               | <b>7</b>  |
| <b>Fig. S8</b>  | Mass spectra of L1+Pd <sup>2+</sup> complex.                                                       | <b>8</b>  |
| <b>Fig. S9</b>  | Mass spectra of L2+Pd <sup>2+</sup> complex.                                                       | <b>8</b>  |
| <b>Fig. S10</b> | <sup>1</sup> H NMR spectra of L1+Pd <sup>2+</sup> complex.                                         | <b>9</b>  |
| <b>Fig. S11</b> | <sup>1</sup> H NMR spectra of L2+Pd <sup>2+</sup> complex.                                         | <b>9</b>  |
| <b>Fig. S12</b> | <sup>1</sup> H NMR titration of L1 and L2 with palladium chloride in DMSO- <i>d</i> <sub>6</sub> . | <b>10</b> |
| <b>Fig. S13</b> | UV-vis spectra of L3 (20 μM).                                                                      | <b>10</b> |
| <b>Fig. S14</b> | UV-vis titration of L1 with different concentrations of Pd <sup>2+</sup> ion.                      | <b>11</b> |
| <b>Fig. S15</b> | UV-vis titration of L2 with different concentrations of Pd <sup>2+</sup> ion.                      | <b>11</b> |
| <b>Fig. S16</b> | Change in emission intensity of L1 and L2 with varying of Pd <sup>2+</sup> ions.                   | <b>12</b> |
| <b>Fig. S17</b> | Stern-Volmer plots for the detection of Pd <sup>2+</sup> ion by L1.                                | <b>12</b> |
| <b>Fig. S18</b> | Stern-Volmer plots for the detection of Pd <sup>2+</sup> ion by L2.                                | <b>13</b> |
| <b>Fig. S19</b> | Determination of detection limit of Pd <sup>2+</sup> ion with L1.                                  | <b>13</b> |
| <b>Fig. S20</b> | Determination of detection limit of Pd <sup>2+</sup> ion with L2.                                  | <b>14</b> |
| <b>Fig. S21</b> | Job's plot for determination of binding stoichiometry of Pd <sup>2+</sup> with L1.                 | <b>14</b> |
| <b>Fig. S22</b> | Job's plot for determination of binding stoichiometry of Pd <sup>2+</sup> with L2.                 | <b>15</b> |
| <b>Table S1</b> | Lifetime profile of L1 and L2 in the absence and presence of Pd <sup>2+</sup> ion.                 | <b>15</b> |
| <b>Table S2</b> | DFT and HOMO-LUMO band gap of L1, L1 + Pd <sup>2+</sup> , L2 and L2 + Pd <sup>2+</sup> .           | <b>15</b> |
| <b>Table S3</b> | DFT of complex L1 + Pd <sup>2+</sup> and L2 + Pd <sup>2+</sup> in presence of HN-group.            | <b>16</b> |
| <b>Table S4</b> | Crystal data and structure refinement for L1                                                       | <b>17</b> |
| <b>Table S5</b> | Comparison of Fluorescent Probes for Pd <sup>2+</sup> Detection.                                   | <b>19</b> |

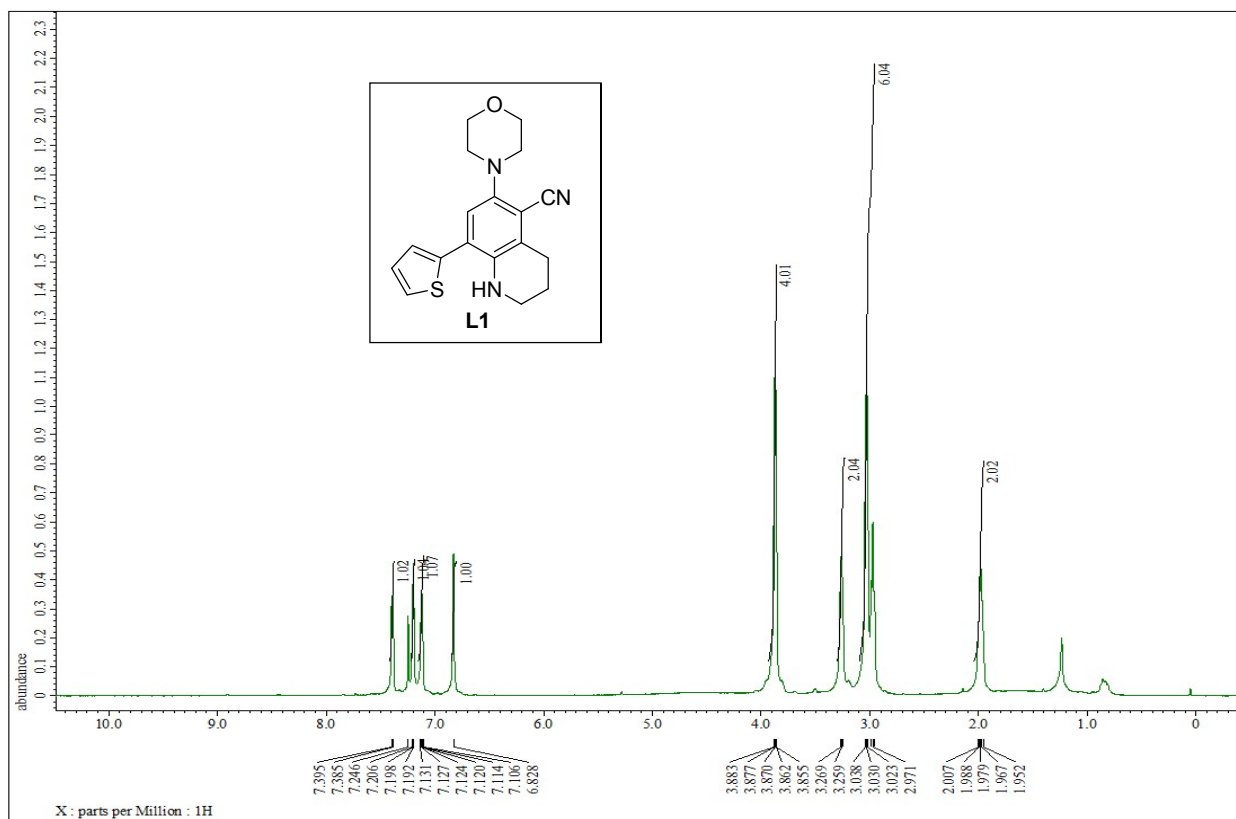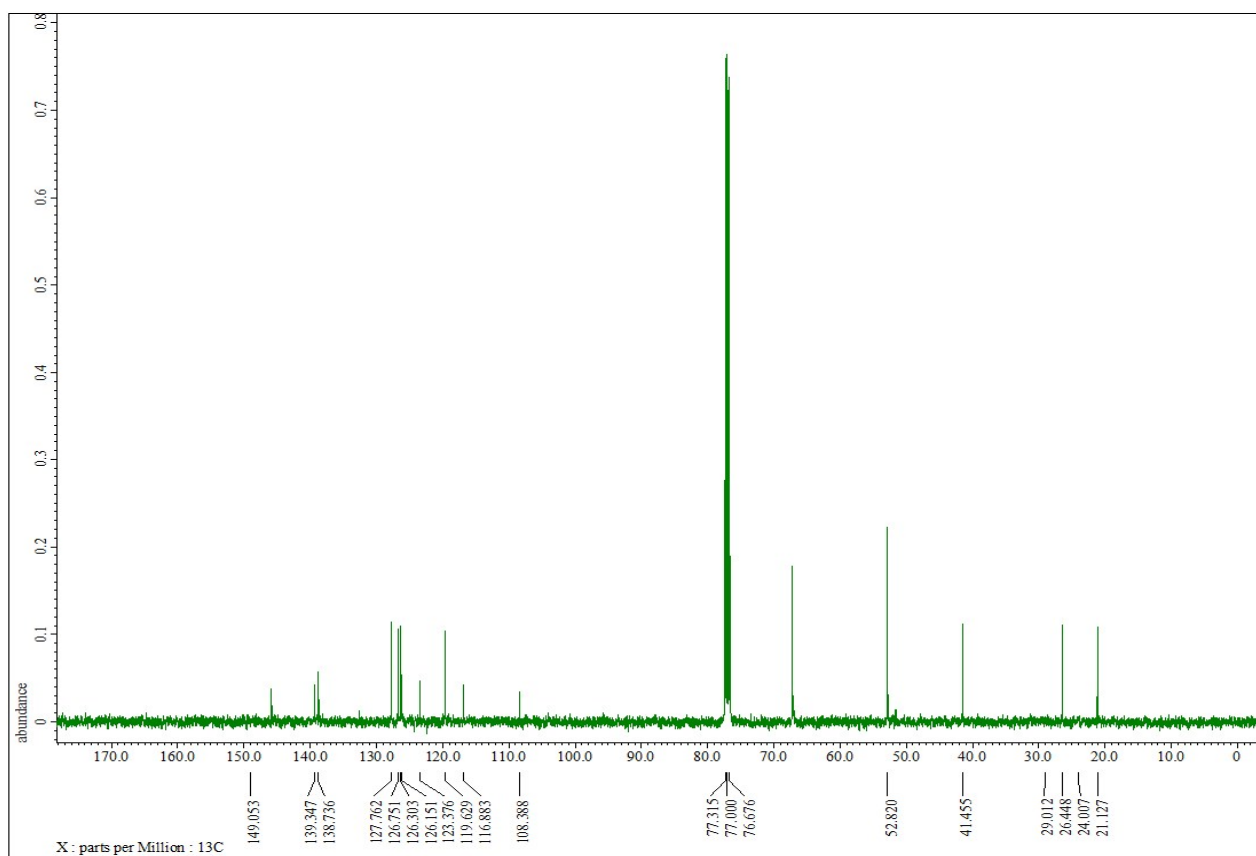

Figure S1: <sup>1</sup>H and <sup>13</sup>C spectra of L1.

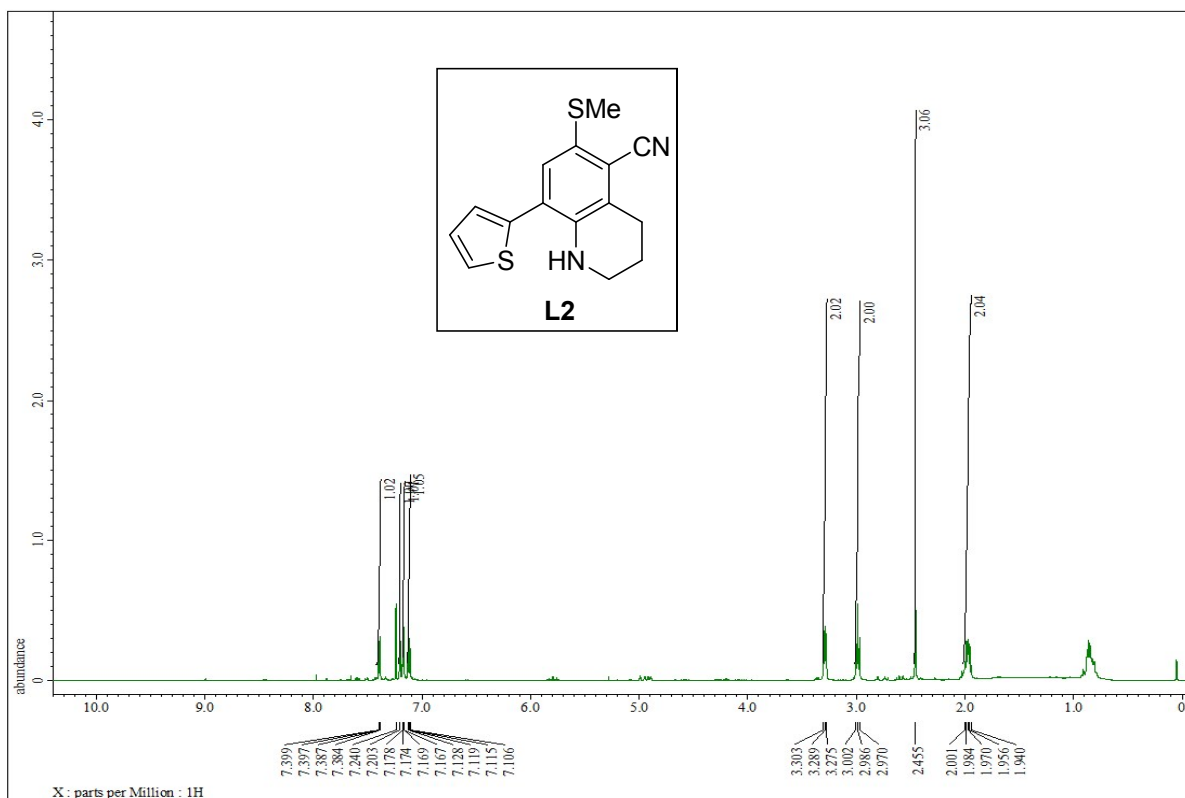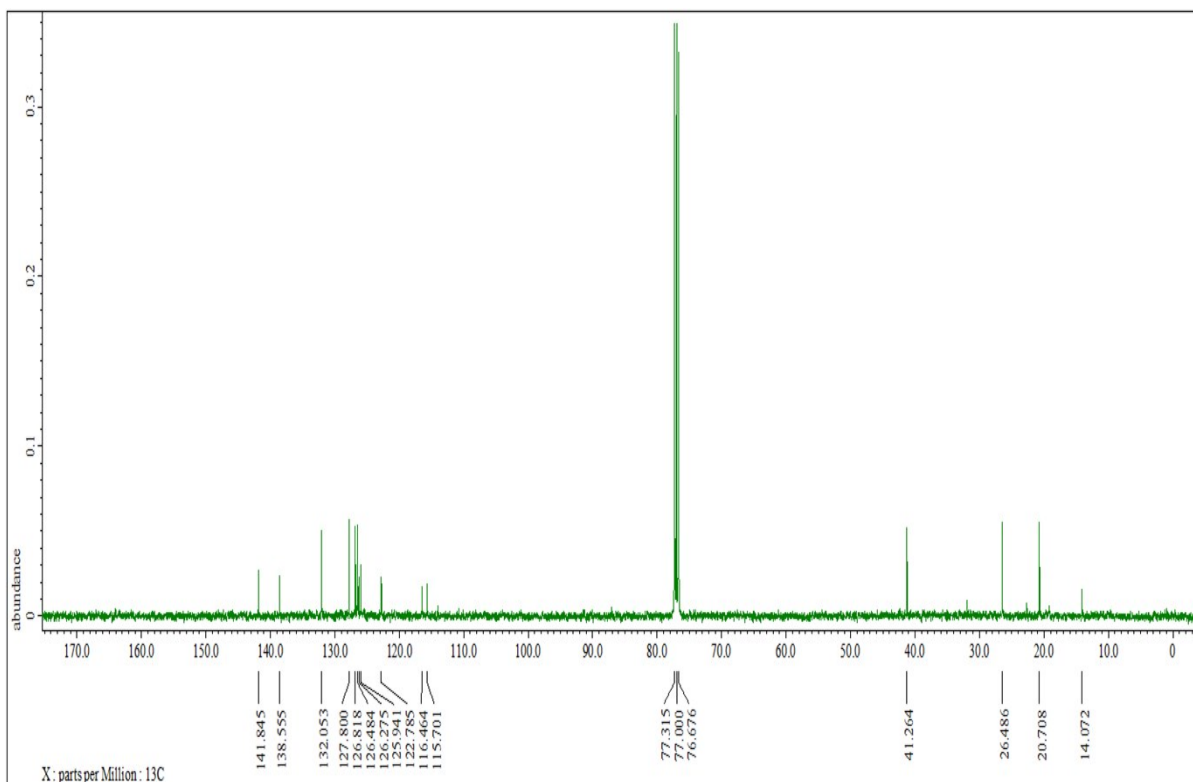

**Figure S2:** <sup>1</sup>H and <sup>13</sup>C spectra of L2.

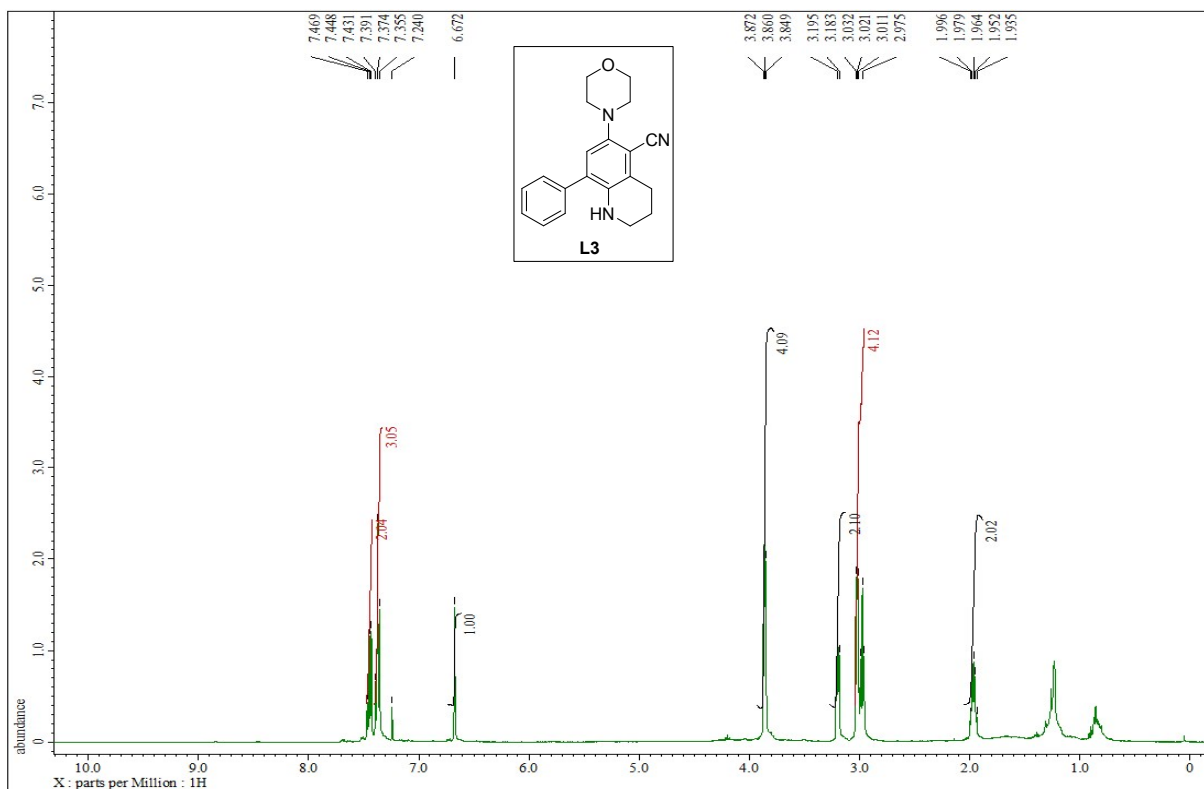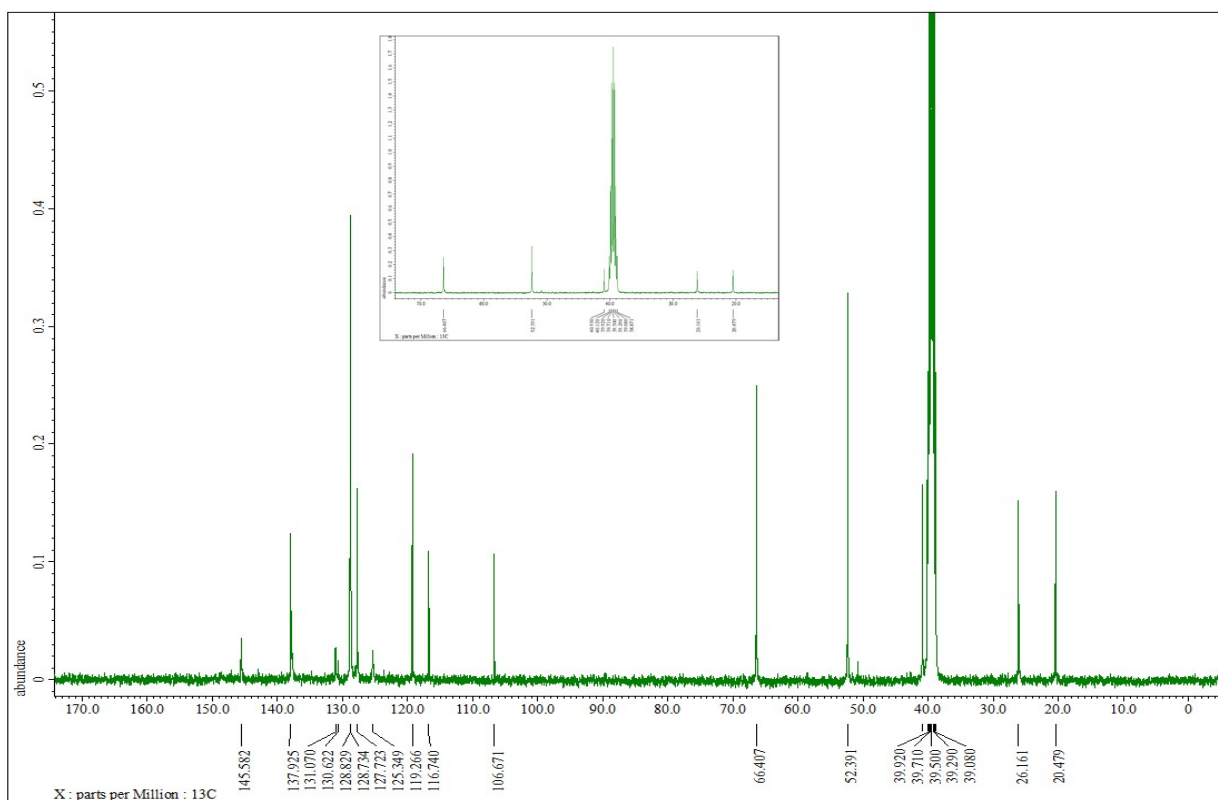

Figure S3:  $^1\text{H}$  and  $^{13}\text{C}$  spectra of L3.

Liquid L1

# Qualitative Compound Report

L-1

|                               |              |                      |                     |
|-------------------------------|--------------|----------------------|---------------------|
| <b>Data File</b>              | SSR -45(D).d | <b>Sample Name</b>   | SSR -45(D)          |
| <b>Sample Type</b>            | Sample       | <b>Position</b>      | P1-D2               |
| <b>Instrument Name</b>        | Instrument 1 | <b>User Name</b>     |                     |
| <b>Acq Method</b>             | 29.10.2014.m | <b>Acquired Time</b> | 22-05-2015 15:39:13 |
| <b>IRM Calibration Status</b> | Success      | <b>DA Method</b>     | Default.m           |
| <b>Comment</b>                |              |                      |                     |

|                               |                                                      |              |
|-------------------------------|------------------------------------------------------|--------------|
| <b>Sample Group</b>           |                                                      | <b>Info.</b> |
| <b>Acquisition SW Version</b> | 6200 series TOF/6500 series<br>Q-TOF B.05.01 (B5125) |              |

### Compound Table

| Compound Label        | RT    | Mass     | Formula        | MFG Formula    | MFG Diff (ppm) | DB Formula     |
|-----------------------|-------|----------|----------------|----------------|----------------|----------------|
| Cpd 1: C18 H19 N3 O S | 0.196 | 325.1248 | C18 H19 N3 O S | C18 H19 N3 O S | 0.25           | C18 H19 N3 O S |

| Compound Label        | m/z      | RT    | Algorithm                 | Mass     |
|-----------------------|----------|-------|---------------------------|----------|
| Cpd 1: C18 H19 N3 O S | 326.1324 | 0.196 | Find by Molecular Feature | 325.1248 |

### MFE MS Spectrum

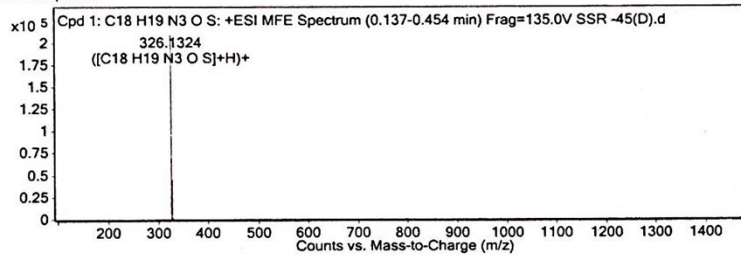

### MFE MS Zoomed Spectrum

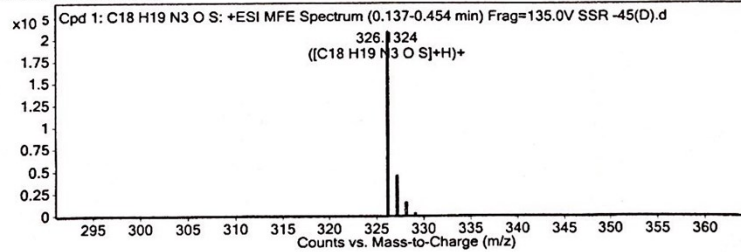

### MS Spectrum Peak List

| m/z      | z | Abund     | Formula        | Ion    |
|----------|---|-----------|----------------|--------|
| 326.1324 | 1 | 209244.95 | C18 H19 N3 O S | (M+H)+ |
| 327.1334 | 1 | 45773.17  | C18 H19 N3 O S | (M+H)+ |
| 328.1316 | 1 | 11671.43  | C18 H19 N3 O S | (M+H)+ |
| 329.1337 | 1 | 1811.91   | C18 H19 N3 O S | (M+H)+ |
| 330.1302 | 1 | 146.24    | C18 H19 N3 O S | (M+H)+ |

--- End Of Report ---

Figure S4: HRMS spectra of L1.

ligand L2

## Qualitative Compound Report

L-2

|                        |              |               |                     |
|------------------------|--------------|---------------|---------------------|
| Data File              | CSR-320.d    | Sample Name   | CSR-320             |
| Sample Type            | Sample       | Position      | P1-C2               |
| Instrument Name        | Instrument 1 | User Name     |                     |
| Acq Method             | 29.10.2014.m | Acquired Time | 15-05-2017 12:58:11 |
| IRM Calibration Status | Success      | DA Method     | Default.m           |
| Comment                |              |               |                     |

|                |                             |       |
|----------------|-----------------------------|-------|
| Sample Group   |                             | Info. |
| Acquisition SW | 6200 series TOF/6500 series |       |
| Version        | Q-TOF B.05.01 (BS125)       |       |

### Compound Table

| Compound Label       | RT | Mass     | Formula       | MFG Formula   | MFG Diff (ppm) | DB Formula    |
|----------------------|----|----------|---------------|---------------|----------------|---------------|
| Cpd 8: C15 H14 N2 S2 | 11 | 286.0595 | C15 H14 N2 S2 | C15 H14 N2 S2 | 1.33           | C15 H14 N2 S2 |

| Compound Label       | m/z      | RT | Algorithm                 | Mass     |
|----------------------|----------|----|---------------------------|----------|
| Cpd 8: C15 H14 N2 S2 | 287.0667 | 11 | Find by Molecular Feature | 286.0595 |

### MFE MS Spectrum

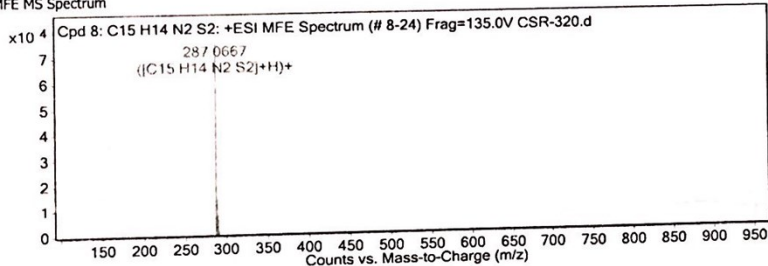

### MFE MS Zoomed Spectrum

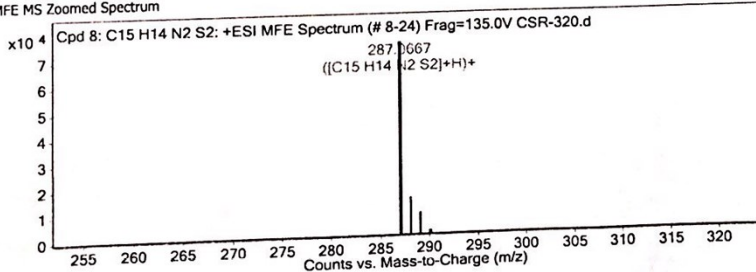

### MS Spectrum Peak List

| m/z      | z | Abund    | Formula       | Ion    |
|----------|---|----------|---------------|--------|
| 287.0667 | 1 | 75639.23 | C15 H14 N2 S2 | (M+H)+ |
| 288.0695 | 1 | 14242.25 | C15 H14 N2 S2 | (M+H)+ |
| 289.064  | 1 | 7612.32  | C15 H14 N2 S2 | (M+H)+ |
| 290.0666 | 1 | 1453.31  | C15 H14 N2 S2 | (M+H)+ |

--- End Of Report ---

Figure S5: HRMS spectra of L2.

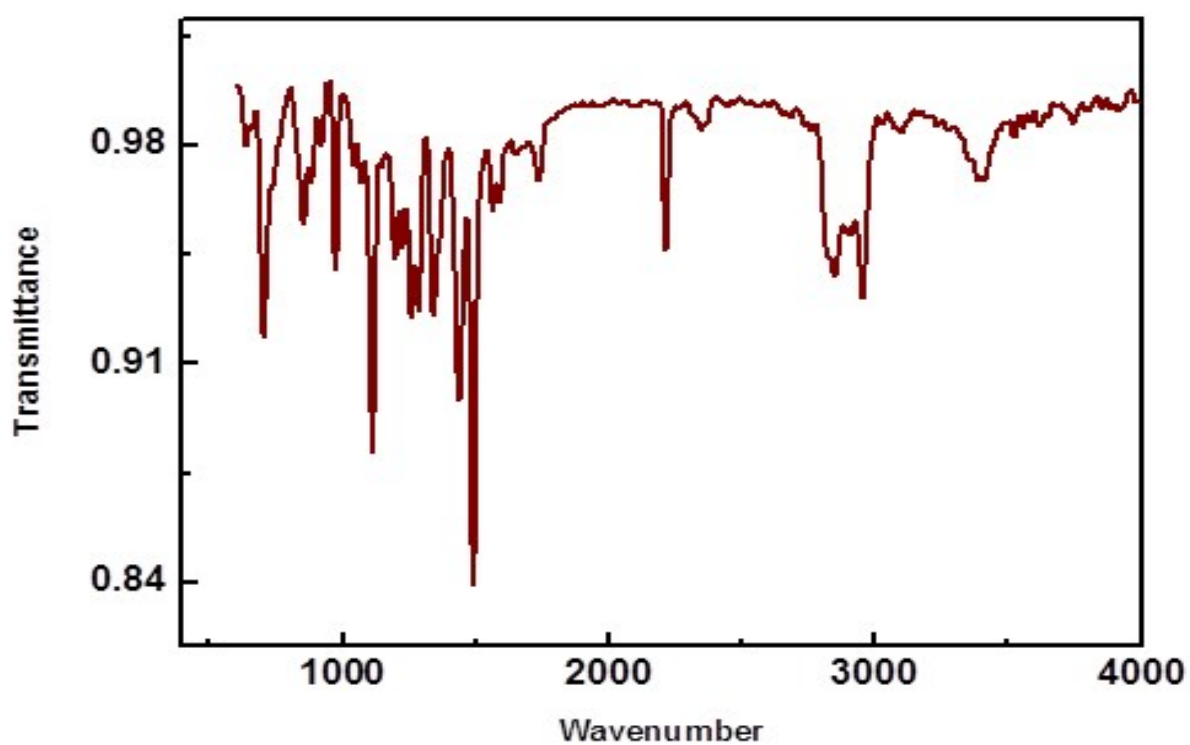

Figure S6: FTIR spectrum of L1.

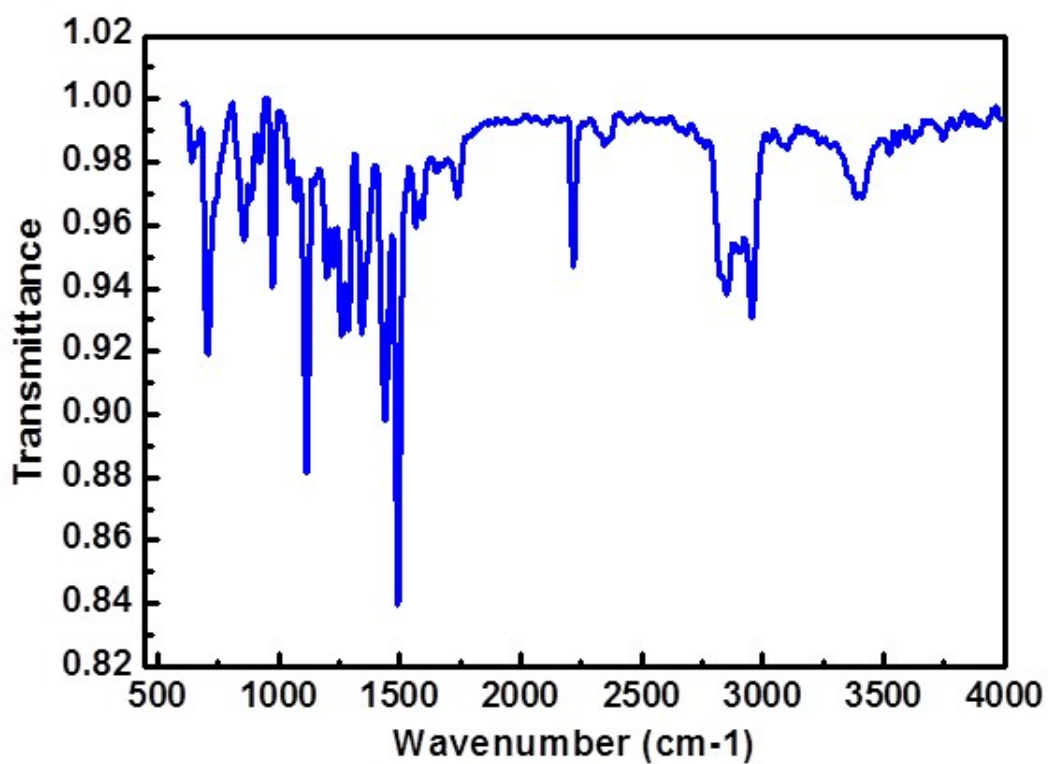

Figure S7: FTIR spectrum of L2.

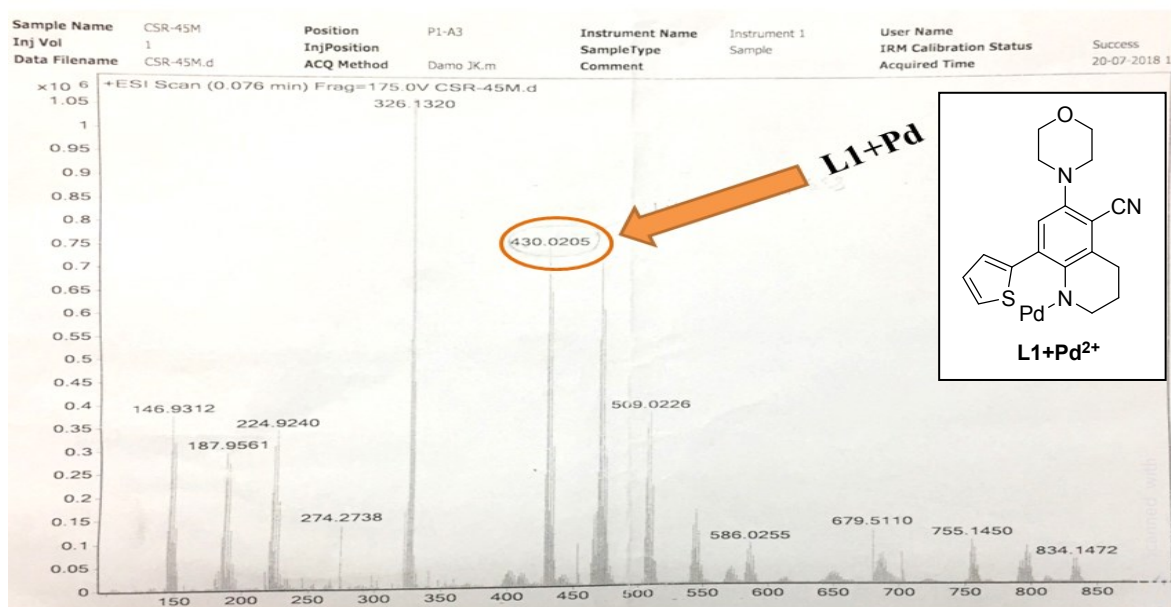

Figure S8: HRMS spectra of L1+Pd<sup>2+</sup> complex.

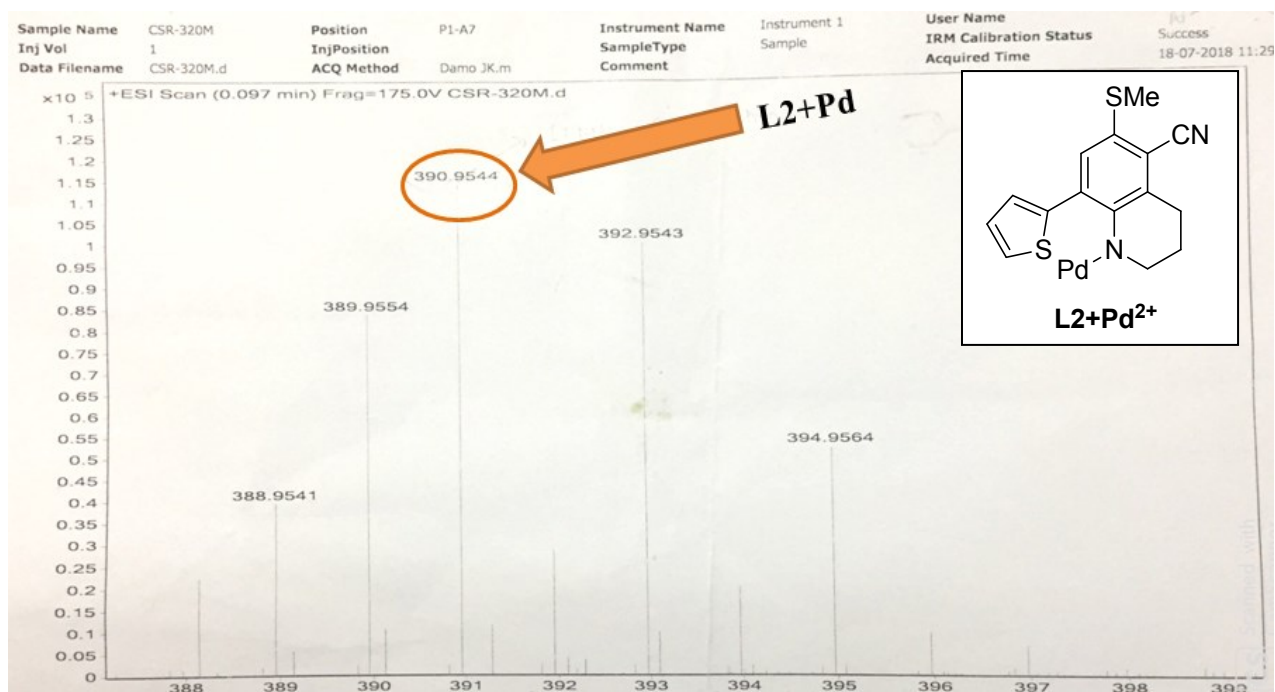

Figure S9: HRMS spectra of L2+Pd<sup>2+</sup> complex.



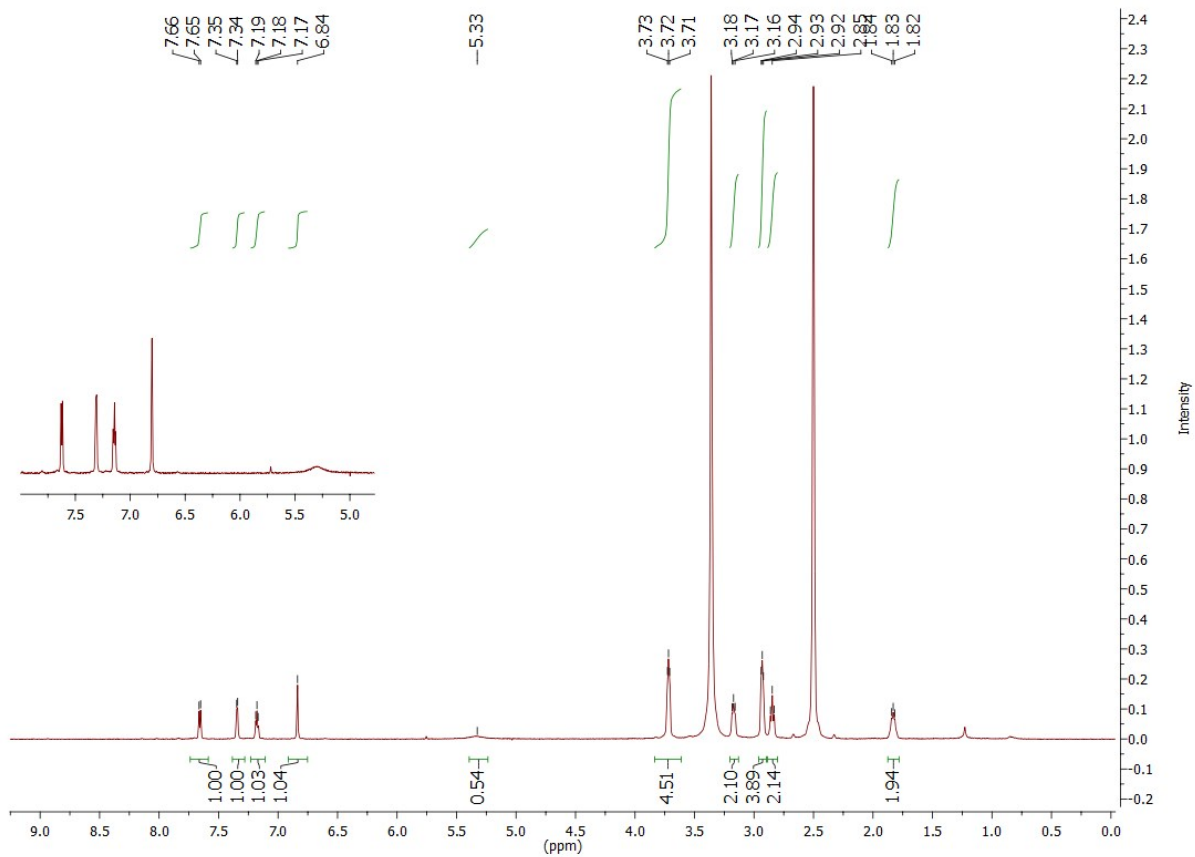

**Figure S10:**  $^1\text{H}$  NMR spectra of L1+Pd $^{2+}$  complex with 4.0 equivalent Pd $^{2+}$  ion.

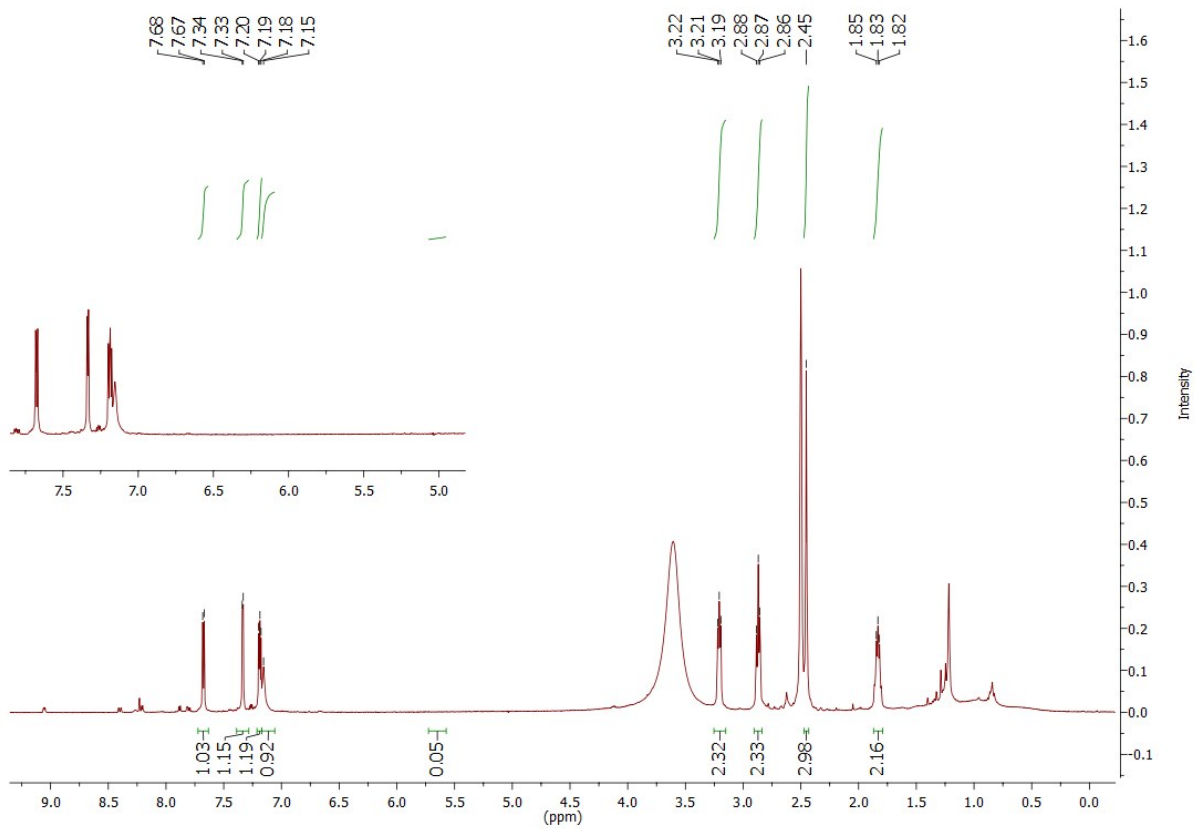

**Figure S11:**  $^1\text{H}$  NMR spectra of L2+Pd $^{2+}$  complex with 4.0 equivalent Pd $^{2+}$  ion.

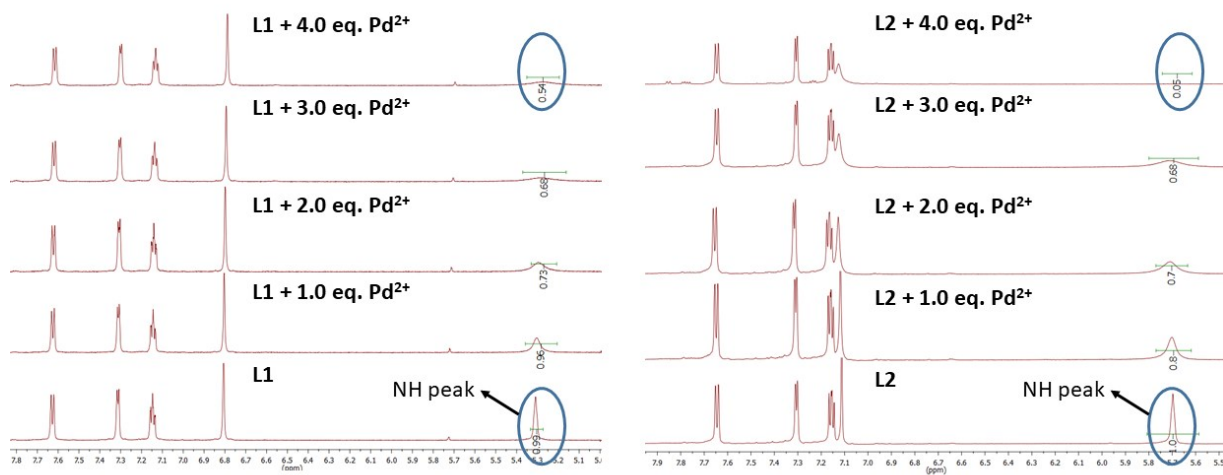

**Figure S12:**  $^1\text{H}$  NMR titration of **L1** and **L2** with palladium chloride in  $\text{DMSO-}d_6$ .

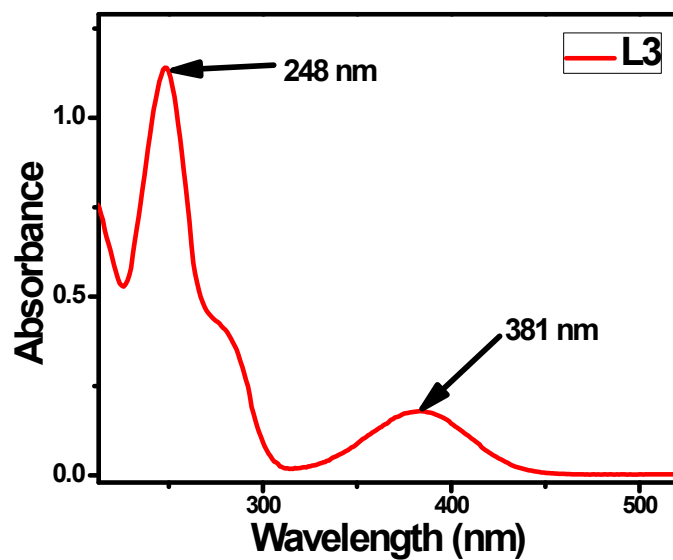

**Figure S13:** UV-vis spectra of **L3** ( $20\ \mu\text{M}$ )

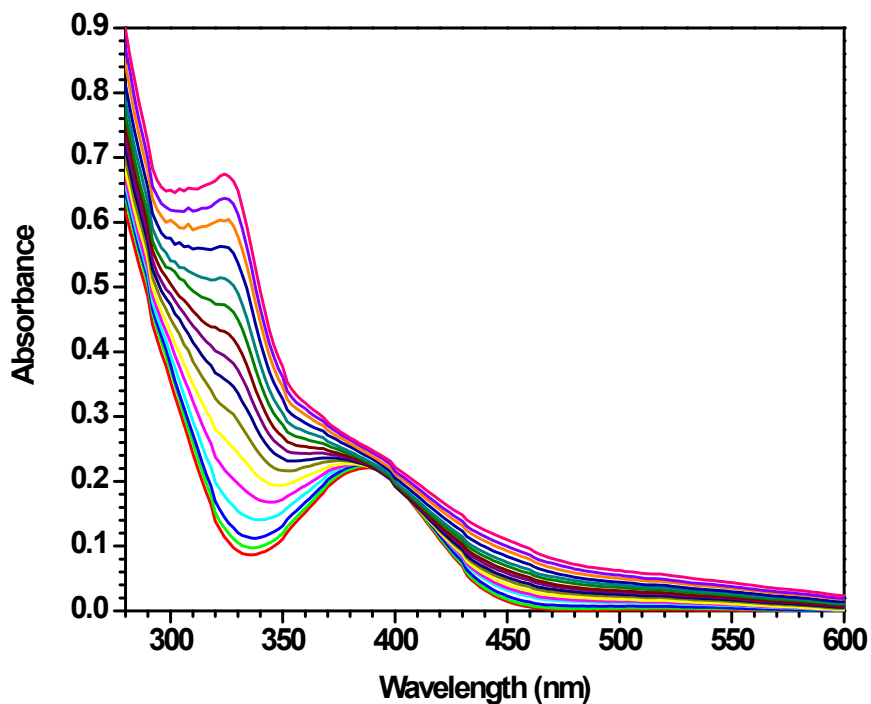

**Figure S14:** Change in absorption spectra of chemosensor L1 (20 μM) with different concentrations of Pd<sup>2+</sup> ion (0–50 μM).

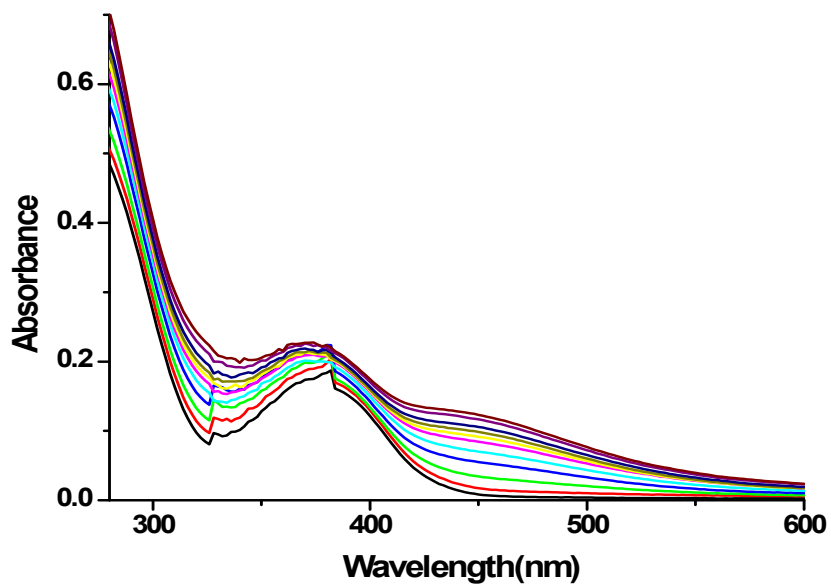

**Figure S15:** Change in absorption spectra of chemosensor L2 (20 μM) with different concentrations of Pd<sup>2+</sup> ion (0–50μM).

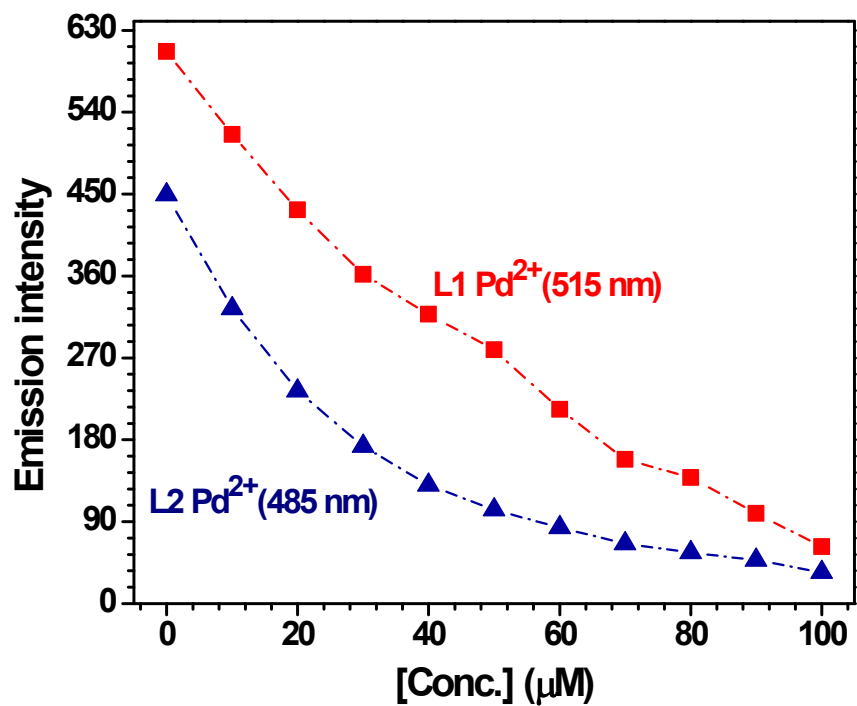

**Figure S16:** Change in emission intensity of L1 (20  $\mu\text{M}$ ) at 515 nm and L2 (20  $\mu\text{M}$ ) at 485 nm with varying concentration of Pd<sup>2+</sup> ions (100  $\mu\text{M}$ ).

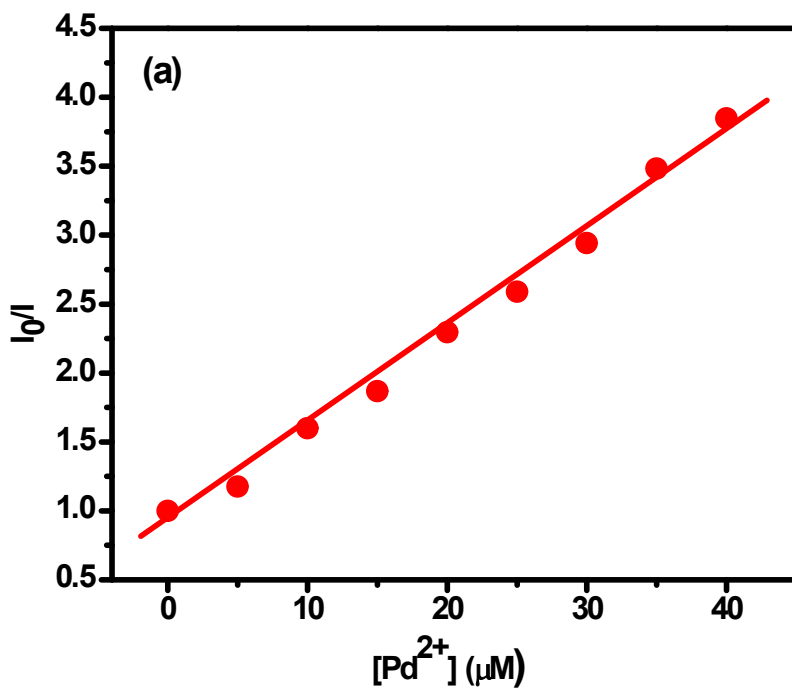

**Figure S17:** Stern-Volmer plots for the detection of Pd<sup>2+</sup> ion by chemosensor L1 (50  $\mu\text{M}$ ).

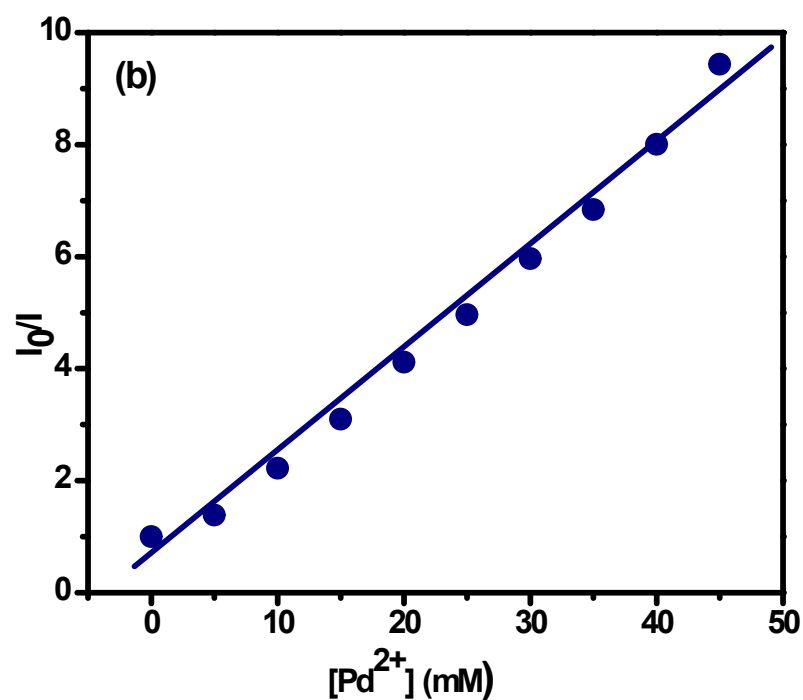

**Figure S18:** Stern-Volmer plots for the detection of Pd<sup>2+</sup> ion by chemosensor L2 (50 μM).

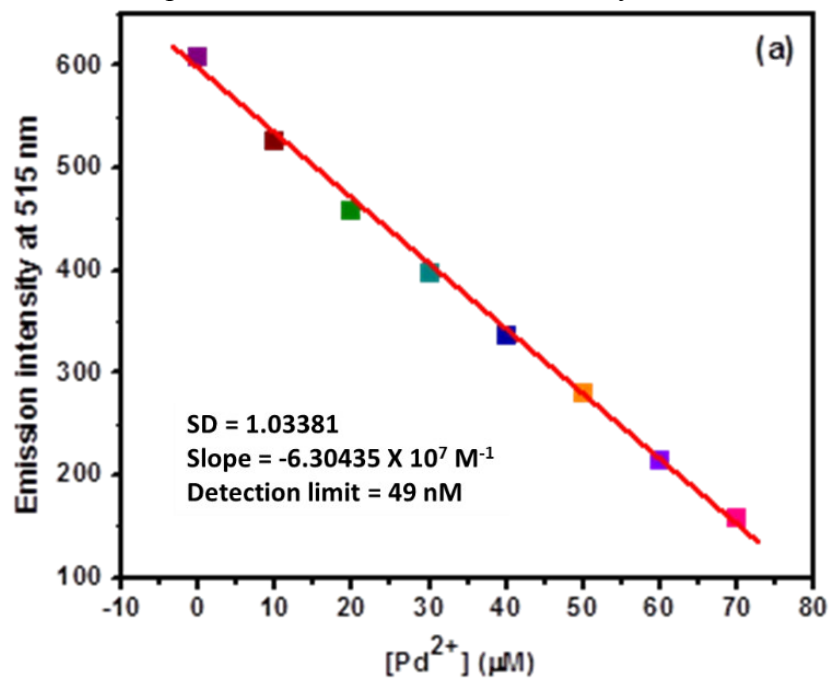

**Figure S19:** Determination of detection limit of for the detection of Pd<sup>2+</sup> ion with L1 (20 μM).

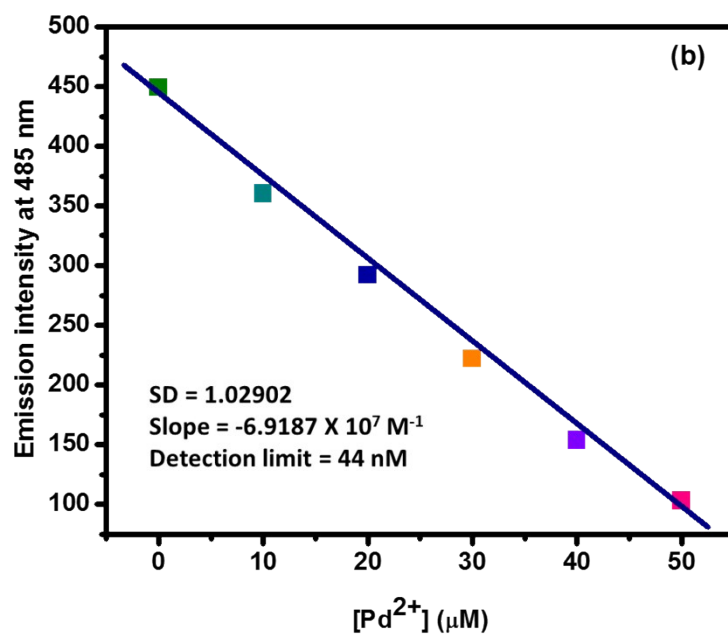

**Figure. S20:** Determination of detection limit of for the detection of  $\text{Pd}^{2+}$  ion with L2 (20  $\mu\text{M}$ ).

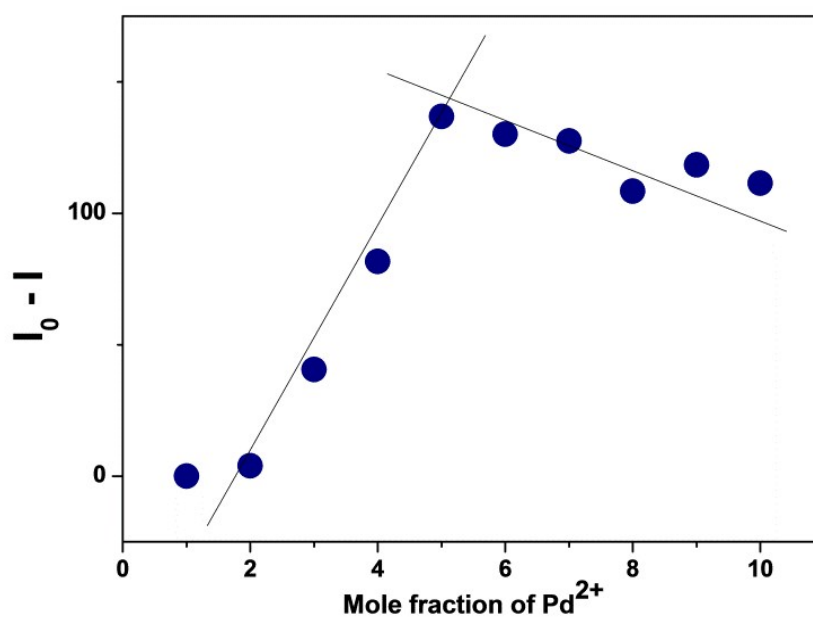

**Figure S21:** Job's plot for the detection of  $\text{Pd}^{2+}$  ion by chemosensor L1 in methanol. Total concentrations of chemosensor L1 and  $\text{Pd}^{2+}$  ion was maintained at 50  $\mu\text{M}$ .

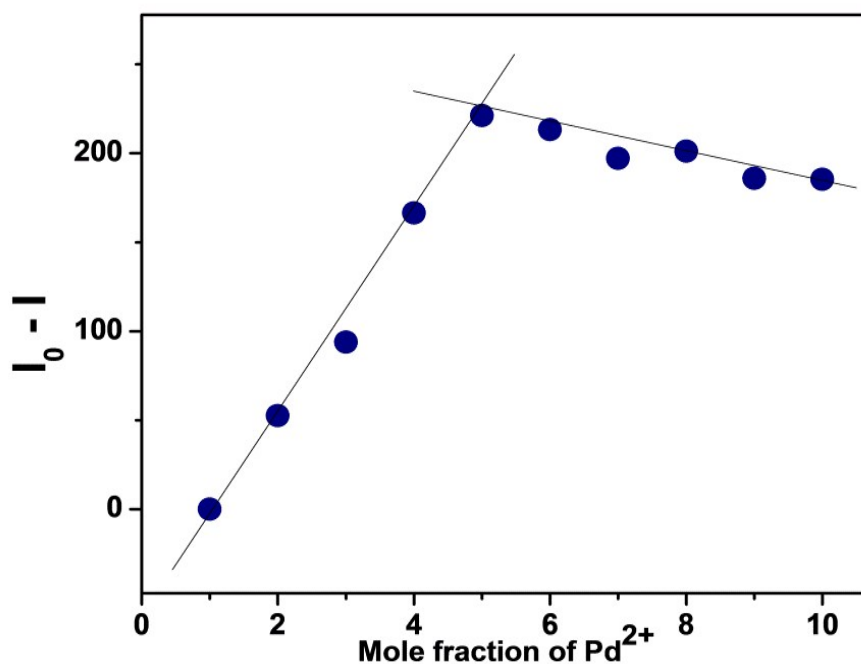

**Figure S22:** Job's plot for the detection of Pd<sup>2+</sup> ion by chemosensor L2 in methanol. Total concentrations of chemosensor L2 and Pd<sup>2+</sup> ion was maintained at 50  $\mu$ M.

**Table S1:** Lifetime profile of probe L1 and L2 in the absence and presence of Pd<sup>2+</sup> ion in methanol

| L                     | $\tau_1$ (ns) | $\tau_2$ (ns) | B1    | B2     | $\tau_{av}$ (ns) |
|-----------------------|---------------|---------------|-------|--------|------------------|
| L1                    | 1.463         | 9.631         | 0.086 | 0.0501 | 7.94             |
| L1 + Pd <sup>2+</sup> | 2.543         | 8.326         | 0.033 | 0.078  | 7.24             |
| L2                    | 0.982         | 8.075         | 0.027 | 0.0951 | 7.83             |
| L2+Pd <sup>2+</sup>   | 2.816         | 14.343        | 0.121 | 0.120  | 4.74             |

**Table S2 :** DFT and HOMO-LUMO band gap of L1, L1 + Pd<sup>2+</sup>, L2 and L2 + Pd<sup>2+</sup>

| Energy        | L1    | L1+Pd <sup>2+</sup> | L2    | L2+Pd <sup>2+</sup> |
|---------------|-------|---------------------|-------|---------------------|
| HOMO (eV)     | -8.15 | -6.46               | -7.94 | -6.88               |
| LUMO (eV)     | -6.00 | -6.00               | -6.03 | -6.47               |
| Band gap (eV) | 2.15  | 0.46                | 1.90  | 0.40                |

**Table S3** : DFT and HOMO-LUMO energy band gap of complex **L1** + **Pd<sup>2+</sup>** and **L2** + **Pd<sup>2+</sup>** in presence of H-atom with N-atom of tetrahydroquinoline.

|               | Optimized structure                                                               | HOMO                                                                              | LUMO                                                                               | Band Gap                   |
|---------------|-----------------------------------------------------------------------------------|-----------------------------------------------------------------------------------|------------------------------------------------------------------------------------|----------------------------|
| <b>L1</b>     | 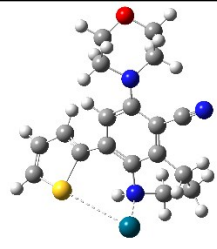 |  |  | <b>LUMO</b><br><b>HOMO</b> |
| <b>Energy</b> |                                                                                   | <b>-2.823 eV</b>                                                                  | <b>-0.374 eV</b>                                                                   | <b>2.455 eV</b>            |
| <b>L2</b>     |  |  |  | <b>LUMO</b><br><b>HOMO</b> |
| <b>Energy</b> |                                                                                   | <b>-2.934 eV</b>                                                                  | <b>-0.632 eV</b>                                                                   | <b>2.302 eV</b>            |

### X-ray Crystallographic Data for compound L1

To a 5 ml glass vial 25-30 mg of 6-morpholino-8-(thiophen-2-yl)-1,2,3,4-tetrahydroquinoline-5-carbonitrile (**L1**) was completely dissolved in DCM followed by addition of 1-2 drops of hexanes. Further, solution was kept for slow evaporation at room temperature until yellow needles type suitable crystal obtained for X-ray analysis.

**Crystal data for L1:** A yellow crystal (0.220 x 0.200 x 0.180 mm<sup>3</sup>) was mounted on a capillary tube for indexing and intensity data collection at 298K on an Oxford Xcalibur Sapphire3 CCD single-crystal diffractometer (MoK $\alpha$  radiation,  $\lambda = 0.71073 \text{ \AA}$ ).<sup>1</sup> Routine Lorentz and polarization corrections were applied, and an absorption correction was performed using the ABSCALE 3 program [CrysAlis Pro software system, Version 171.34; Oxford Diffraction Ltd., Oxford, U.K., 2011]. Data reduction was performed with the CrysAllis-PRO.<sup>1</sup> The structure was solved by direct methods using SIR-92 program<sup>2</sup> and refined on F2 using all data by full matrix least-squares procedures with SHELXL-2016/6 incorporated in WINGX 1.8.05 crystallographic collective package.<sup>3</sup> The hydrogen atoms were placed at the calculated positions and included in the last cycles of the refinement. All calculations were done using the WinGX software package.<sup>4,5</sup> Crystallographic data collection and structure solution parameters are summarized in **Table S3**.



**Table S4:** Crystal data and structure refinement for L1

---

|                                         |                                             |                |
|-----------------------------------------|---------------------------------------------|----------------|
| <b>CCDC No</b>                          | <b>1974743</b>                              |                |
| <b>Identification code</b>              | csr-45                                      |                |
| <b>Empirical formula</b>                | C18 H19 N3 O S                              |                |
| <b>Formula weight</b>                   | 325.42                                      |                |
| <b>Temperature</b>                      | 298(2) K                                    |                |
| <b>Wavelength</b>                       | 0.71073 Å                                   |                |
| <b>Crystal system</b>                   | Triclinic                                   |                |
| <b>Space group</b>                      | P -1                                        |                |
| <b>Unit cell dimensions</b>             | a = 8.5585(6) Å                             | a = 83.453(6)° |
|                                         | b = 8.9403(6) Å                             | b = 70.241(6)° |
|                                         | c = 11.5304(7) Å                            | g = 78.827(6)° |
| <b>Volume</b>                           | 813.45(9) Å <sup>3</sup>                    |                |
| <b>Z</b>                                | 2                                           |                |
| <b>Density (calculated)</b>             | 1.329 Mg/m <sup>3</sup>                     |                |
| <b>Absorption coefficient</b>           | 0.207 mm <sup>-1</sup>                      |                |
| <b>F(000)</b>                           | 344                                         |                |
| <b>Crystal size</b>                     | 0.220 x 0.200 x 0.180 mm <sup>3</sup>       |                |
| <b>Theta range for data collection</b>  | 3.64° to 25.03°                             |                |
| <b>Index ranges</b>                     | -10 ≤ h ≤ 10, -10 ≤ k ≤ 10, -13 ≤ l ≤ 13    |                |
| <b>Reflections collected</b>            | 10130                                       |                |
| <b>Independent reflections</b>          | 2865 [R(int) = 0.0491]                      |                |
| <b>Completeness to theta = 24.997°</b>  | 99.6 %                                      |                |
| <b>Refinement method</b>                | Full-matrix least-squares on F <sup>2</sup> |                |
| <b>Data / restraints / parameters</b>   | 2865 / 4 / 208                              |                |
| <b>Goodness-of-fit on F<sup>2</sup></b> | 1.055                                       |                |
| <b>Final R indices [I &gt; 2σ(I)]</b>   | R1 = 0.0429, wR2 = 0.1126                   |                |
| <b>R indices (all data)</b>             | R1 = 0.0491, wR2 = 0.1179                   |                |
| <b>Extinction coefficient</b>           | n/a                                         |                |
| <b>Largest diff. peak and hole</b>      | 0.29 and -0.25 e.Å <sup>-3</sup>            |                |

---

**Determination of Stern–Volmer constant (K<sub>SV</sub>) and detection limit**

Fluorescence titrations were further used to calculate the quenching constant with a plot using the Stern–Volmer equation [Eq. 1]<sup>6</sup>.

$$I_0/I = 1 + K_{SV}[Pd^{2+}] \dots\dots\dots(1)$$

Where  $I_0$  and  $I$  is the emission intensity of molecules in the absence and presence of fluorescence quenching metal ion ( $Pd^{2+}$  ion here) respectively.  $K_{SV}$  is the Stern–Volmer constant i.e. also called quenching constant. The detection limit was calculated using Eq. 2.<sup>7</sup>

$$LOD = \frac{3\sigma}{k} \dots\dots\dots (2)$$

Where  $\sigma$  is the standard deviation of blank measurements and  $k$  is the slope of a plot of emission intensity with metal ion concentration. Binding stoichiometry of  $Pd^{2+}$  complexes determined by Job's plot.<sup>8</sup> The binding constant ( $K_b$ ) for **L1** and **L2** with  $Pd^{2+}$  ion was determined by Benesi–Hildebrand equation (3) with a plot between  $1/(I - I_0)$  against  $1/[Pd^{2+}]$ .<sup>9</sup>

$$\frac{1}{(I - I_0)} = \frac{1}{\{K_a(I_0 - I_{min})[Pd^{2+}]\}} + \frac{1}{(I_0 - I_{min})} \dots\dots\dots (3)$$

Where,  $I$  is the emission intensity of **L1** and **L2** in presence of  $Pd^{2+}$  ion at 515 and 485 nm,  $I_0$  is the intensity of **L1** and **L2** in absence of  $Pd^{2+}$  ion and  $I_{min}$  is the minimum fluorescence intensity in presence of  $Pd^{2+}$  ion. The plot  $1/(I - I_0)$  vs.  $1/[Pd^{2+}]$  were linear and  $K_a$  value was obtained from the slope and intercept of the line.

The relative fluorescence quantum yields were determined with quinine sulfate B ( $\Phi_S = 0.54$ ) in 0.1 M  $H_2SO_4$  as a standard and calculated using the following equation 4.<sup>10</sup>

$$\Phi_X = \Phi_S \times (I_X/I_S) \times (A_S/A_X) \times (\eta_X/\eta_S)^2 \dots\dots\dots (4)$$

Where  $\Phi$  represents quantum yield;  $A$  is absorbance at the excitation wavelength;  $\lambda_{ex}$  is the excitation wavelength;  $\eta$  is the refractive index of the solution and subscripts  $x$  and  $s$  refer to unknown and standard samples respectively. Therefore, the fluorescence quantum yield of ligand and were 0.62 and 0.75 respectively.

### Comparison of previously reported $Pd^{2+}$ chemosensors

The chemosensors for  $Pd^{2+}$  are summarized in the table and compared his limit of detection, solvents and TLC strip sensing activity with our developed chemosensors (**L1** and **L2**).<sup>11-24</sup> The chemosensor **L1** and **L2** showed best limit of detection (sensitivity) and selectivity than other. The TLC plate sensing was also equated, but most of groups did not reported the sensing with TLC strip. After comparison, we found **L1** and **L2** exhibited best response than listed chemosensors.

**Table S5:** Comparison of fluorescent probes for Pd<sup>2+</sup> detection

| Compounds                                                                           | LOD ( $\mu\text{M}$ ) | Solvents                                        | TLC Plates |
|-------------------------------------------------------------------------------------|-----------------------|-------------------------------------------------|------------|
| 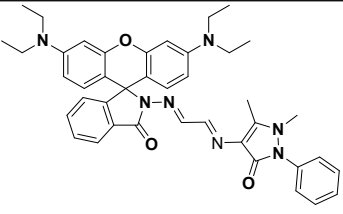   | 11.9                  | CH <sub>3</sub> CN/H <sub>2</sub> O (4:1)       | NA         |
|    | 0.74                  | CH <sub>3</sub> CN/ H <sub>2</sub> O (4/1, v/v) | Yes        |
|   | 1.0                   | pH 7.4 HEPES 10 mM, 5% DMSO                     | NA         |
|  | 0.78                  | HEPES buffer in 1% DMF                          | Yes        |
|  | 0.93                  |                                                 |            |
|  | 0.095                 | CH <sub>3</sub> CN/H <sub>2</sub> O (v/v = 1/4) | NA         |
|  | 0.034                 | Aqueous-Ethanollic (v/v, 1:1)                   | NA         |

|                                                                                     |       |                                                   |     |
|-------------------------------------------------------------------------------------|-------|---------------------------------------------------|-----|
| 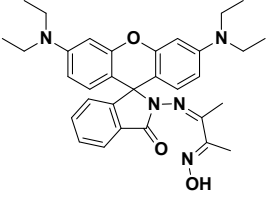   | 0.200 | Tris-HCl buffer                                   | NA  |
|    | 0.070 | Acetonitrile-water (50:50 v/v)                    | NA  |
|    | 0.082 |                                                   |     |
|   | 0.19  | methanol/PBS (1:1, v/v, pH 7.4)                   | Yes |
|  | 0.29  | DMF:H <sub>2</sub> O (95:5, v/v)                  | NA  |
|  | 0.210 | CH <sub>3</sub> OH/aqueous HEPES buffer           | Yes |
|  | 0.18  | Ethanol/H <sub>2</sub> O (8:2, v/v, HEPES buffer) | NA  |
|  | 0.25  | Aqueous HEPES buffer                              | NA  |



- (9) A. Senthilvelan, I. Ho, K. Chang, G. Lee, Y. Liu, and W. Chung, *Chem. Eur. J.*, 2009, **15**, 6152–6155.
- (10) H. A. Benesi, J. H. A. Hildebrand, *J. Am. Chem. Soc.* 1949, **71**, 2703–2707.
- (11) S. Mondal, S. K. Manna, S. Pathak, A. Al Masum and S. Mukhopadhyaya, *New J. Chem.*, 2019, **43**, 3513-3519
- (12) C. K. Manna, S. Gharami, K. Aich, L. Patra and T. K. Mondal, *New J. Chem.*, 2019, **43**, 16915-16920.
- (13) M. Lee, T. Lim, Y. Lee, S. Kang and M. S. Han, *Dyes Pigm.*, 2017, **144**, 69-75.
- (14) P. Kumar, V. Kumar and R. Gupta, *RSC Adv.*, 2017, **7**, 7734–7741.
- (15) A. K. Bhanja, S. Mishra, K. Kar, K. Naskar, S. Maity, K. D. Saha and C. Sinha, *New J. Chem.*, 2018, **42**, 17351-17358.
- (16) A. K. Adak, B. Dutta, S. K. Manna, and C. Sinha, *ACS Omega*, 2019, **4**, 18987–18995.
- (17) Q. Huang, Y. Zhou, Q. Zhang, E. Wang, Y. Min, H. Qiao, J. Zhang and T. Ma, *Sens. Actuators B: Chem.*, 2015, **208**, 22–29.
- (18) F.-K. Tang, S.-M. Chan, T. Wang, C.-S. Kwan, R. Huang, Z. Cai and K. C.-F. Leung, *Talanta* 2020, **210**, 120634.
- (19) M. Yang, Y. Bai, W. Meng, Z. Cheng, N. Su and B. Yang, *Inorg. Chem. Commun.*, 2014, **46**, 212-219.
- (20) L. Yang, C. Wang, G. Chang and X. Ren, *Sens. Actuators B: Chem.*, 2017, **240**, 212–219.
- (21) S. Mahata, A. Bhattacharya, J. P. Kumar, B. B. Mandal and V. Manivannan, *J. Photochem. Photobiol. A: Chem.*, 2020, **394**, 112441.
- (22) A. K. Adak, R. Purkait, S. Manna, B. C. Ghosh, S. Pathak and C. Sinha, *New J. Chem.*, 2019, **43**, 3899-3906.
- (23) M. Li, X.-J. Jiang, H.-H. Wu, H.-L. Lu, H.-Y. Li, H. Xu, S. Q. Zang and T. C. W. Maka, *Dalton Trans.* 2015, **44**, 17326-17334.
- (24) X. Li, H. Huang, Y. Zhu, H. Zhao and Z. Wang, *RSC Adv.*, 2015, **5**, 105810-105813.
